# Supplementary material
Source: PubMed Central journal article supplement (PMC3011259)
Supplement: cam0404_0527SD1.pdf [file cam0404_0527SD1.pdf]

**FigS1**

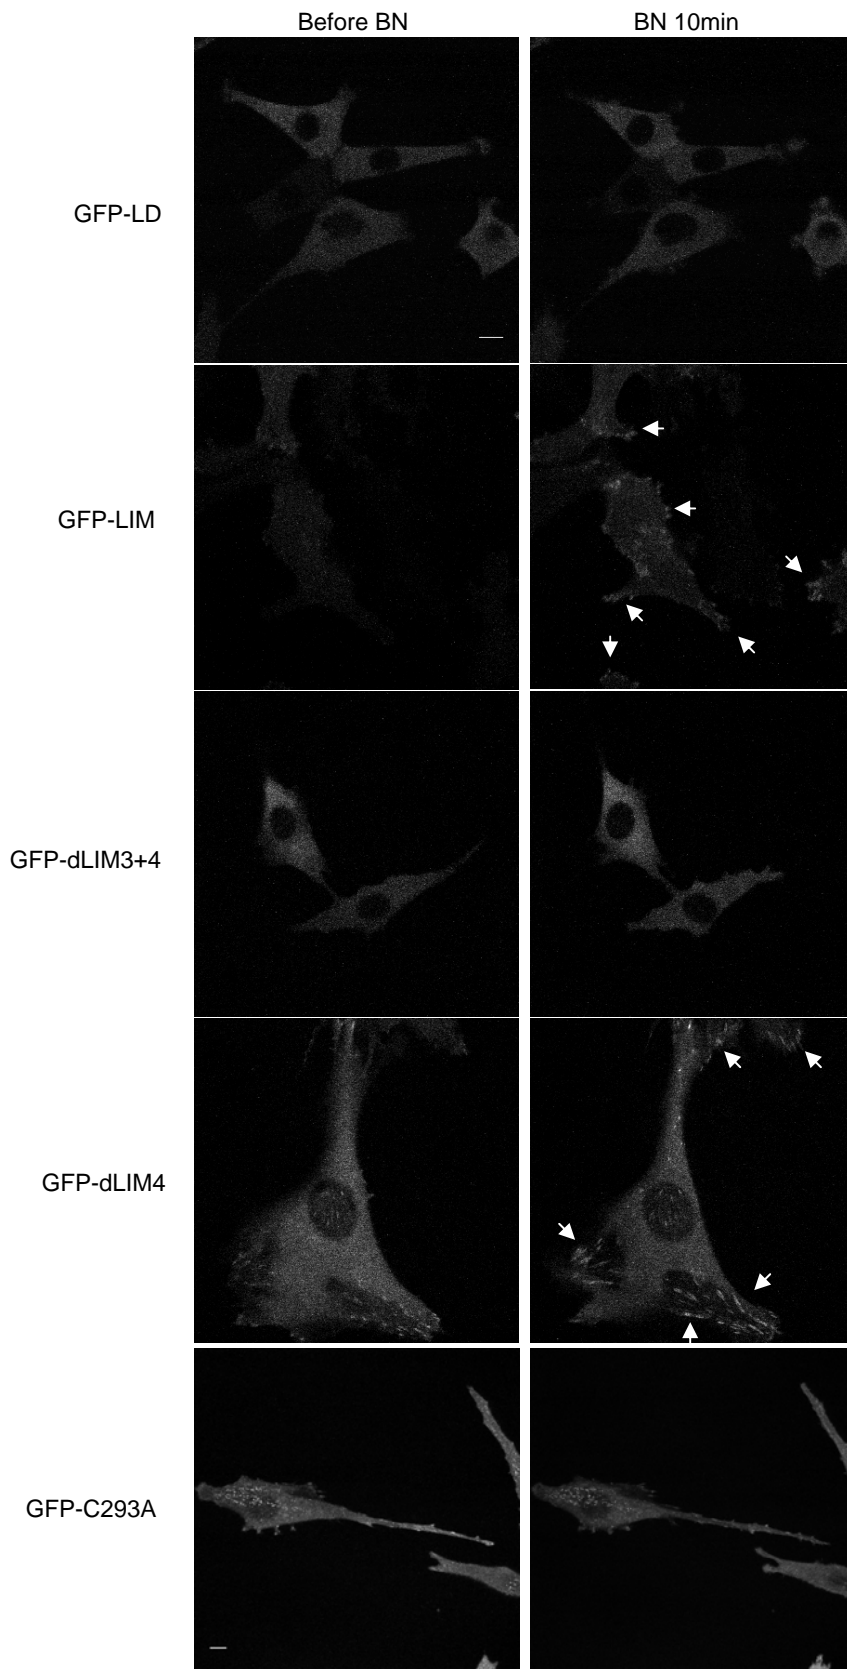

**Fig. S1. LIM3 is essential for LPXN focal adhesion targeting.**

BALB/c fibroblasts stably expressing GRPr and GFP-tagged LPXN constructs were imaged in real time by confocal microscopy before and after addition of BN. Results shown are the representative images. Arrows indicate translocated LPXN. Bars, 10  $\mu$ m.

**FigS2**

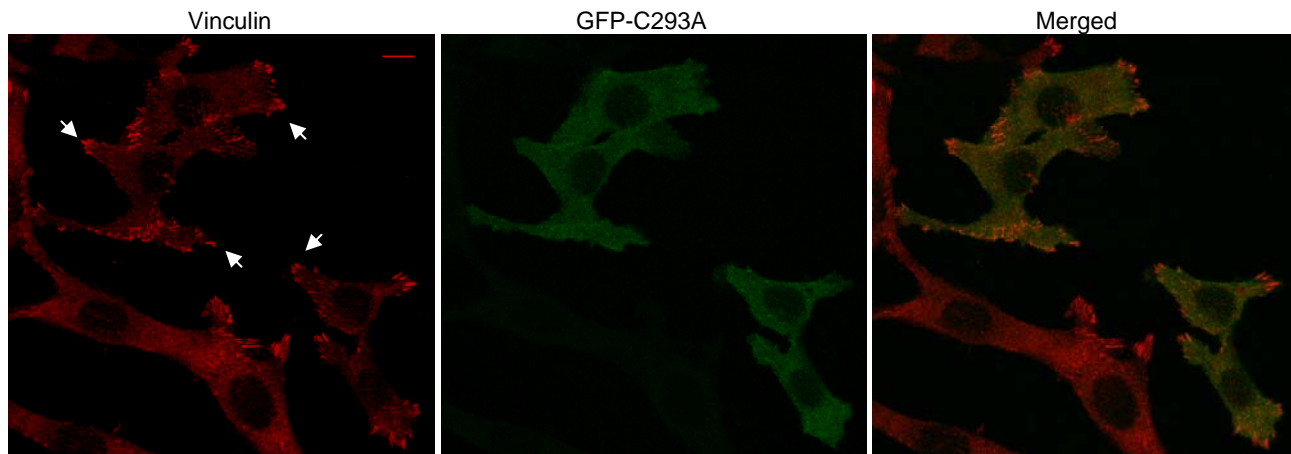

**Fig. S2. BN stimulates focal adhesion formation in GFP-C293A-expressing cells.** BALB/c fibroblasts stably expressing GRPr and GFP-C293A (green) were treated with 100 nM BN for 10 min, fixed and stained with anti-vinculin antibody (red). Arrows indicate some focal adhesions. Bars, 10  $\mu$ m.

**FigS3**

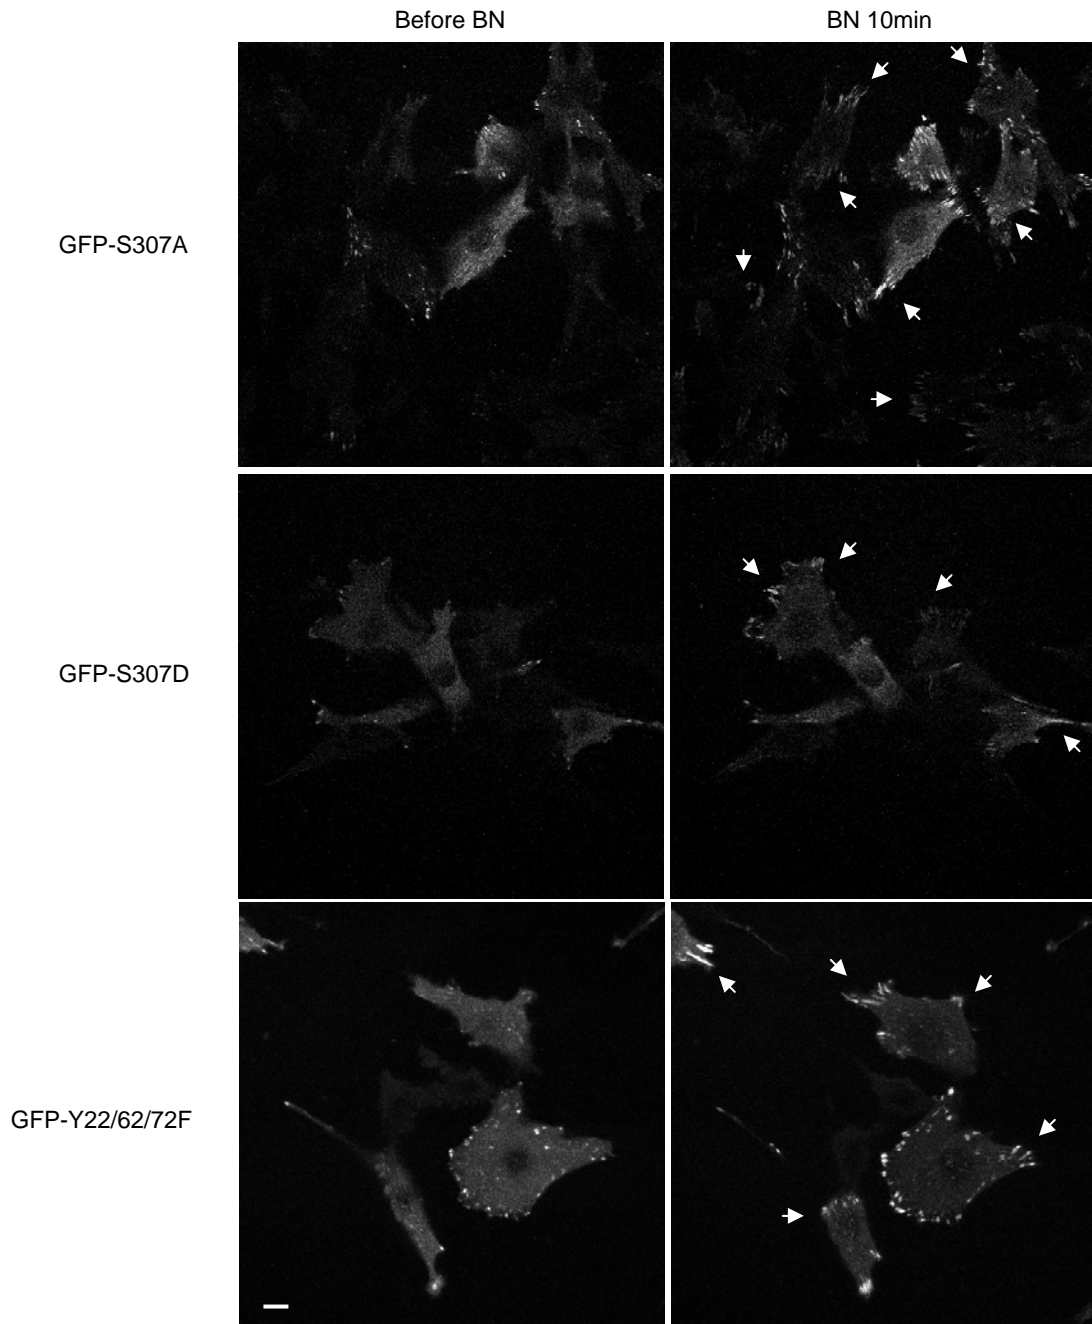

**Fig. S3. Phosphorylation of S307, Y22, Y62 and Y72 is not required for LPXN FA targeting.**

BALB/c fibroblasts stably expressing GRPr and GFP-tagged LPXN point mutants were imaged in real time by confocal microscopy before and after addition of BN. Results shown are representative images. Only one of the non-phosphorylatable mutants (GFP-S307A) is shown. Bars, 10  $\mu$ m.

**FigS4****A**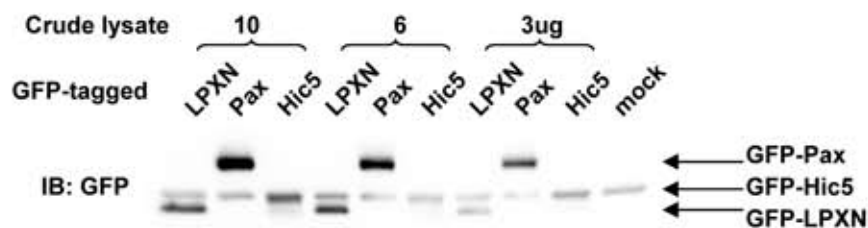**B**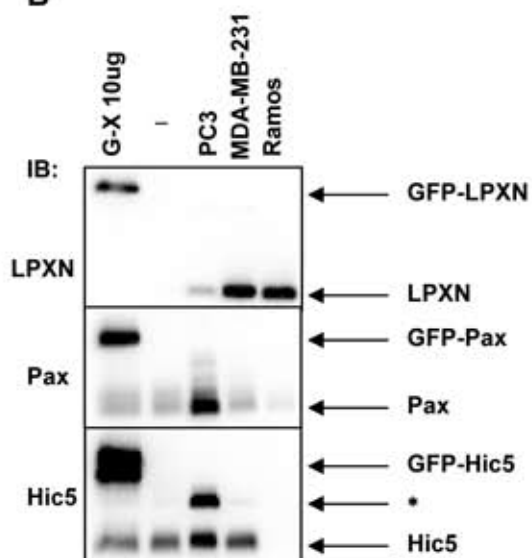**C**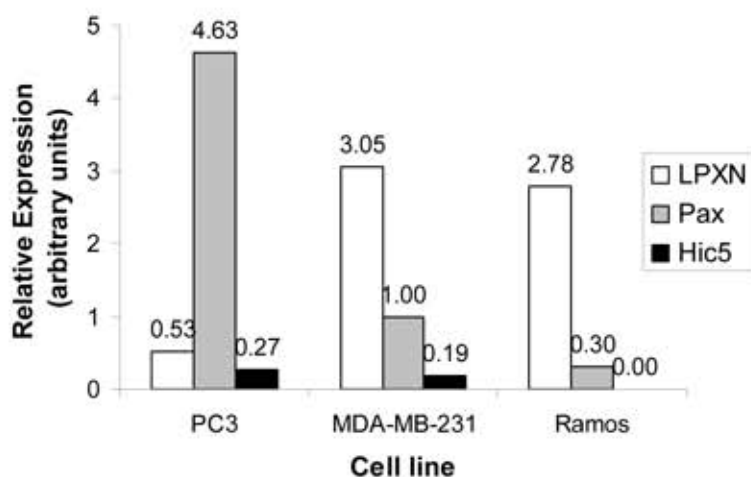**Fig. S4. Relative expression level of 3 paxillin family members in PC3, MDA-MB-231 and Ramos cells.**

(A) CHOP cells were transiently transfected with plasmids expressing GFP-tagged LPXN, paxillin (Pax), or Hic5. Mock-transfected CHOP cells (mock) were included as a background control. 3, 6 or 10 µg of cell lysates were analyzed by anti-GFP immunoblotting to determine an expression ratio (GFP-LPXN: GFP-paxillin: GFP-Hic5; ratio1). (B) 10 µg of transfected CHOP cell lysates (G-X refers to GFP-LPXN (top), GFP-paxillin (middle), and GFP-Hic5 (bottom)) were resolved on SDS-PAGE concurrently with 20 µg of cell lysates from non-transfected CHOP cells (-), PC3 cells, MDA-MB-231 cells and Ramos cells. Western blotting was performed using anti-LPXN, anti-paxillin, or anti-Hic5 antibody, relative protein levels quantitated to obtain the ratio between GFP-tagged and endogenous protein (G-X: X; ratio2) as well as the relative expression of one family member among three cell lines (XPC3: XMDA-MB-231: XRamos; ratio3). \* Paxillin detected by anti-Hic5 antibody. (C) Using ratios 1-3 generated from (A, B), relative expression levels of endogenous LPXN, paxillin and Hic5 were calculated. Briefly, a comparison of endogenous expression of a family member with its GFP-tagged construct was made using a family member specific antibody (ratio2), then a comparison of GFP-tagged construct with each other using a GFP antibody (ratio1). Finally, a comparison of one family member level among three cancer cell lines was made (ratio3). Numbers above the bars refer to relative endogenous protein levels of paxillin family members.

**FigS5**

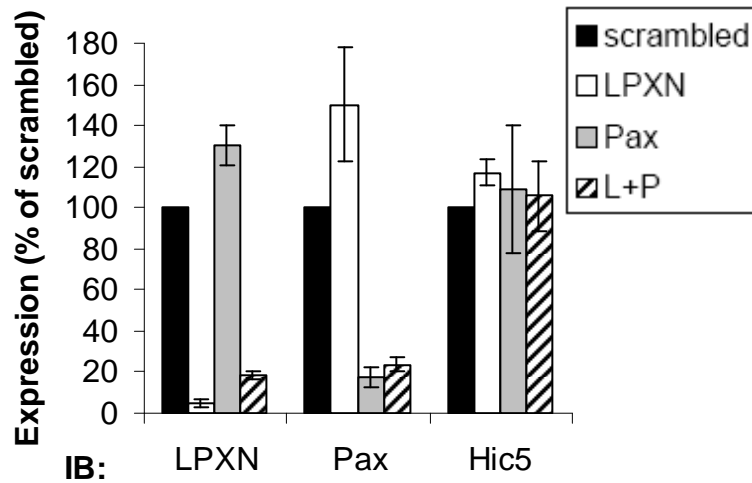

**Fig. S5. siRNA-mediated knockdown of LPXN or/and paxillin in MDA-MB-231 cells.** MDA-MB-231 cells were transiently transfected with scrambled, LPXN, paxillin (Pax) or both LPXN and paxillin (L+P) siRNA duplexes as described under *Materials and Methods*. 20  $\mu$ g of cell lysates were resolved on SDS-PAGE, subjected to anti-LPXN, anti-paxillin or anti-Hic5 Western blotting, and expression of each protein quantified relative to scrambled siRNA-treated cells. The mean  $\pm$  s.e.m. from six experiments is shown.
